# Supplementary material for: Damage-free hybrid encapsulation of organic field-effect transistors to reduce environmental instability
Source: Royal Society of Chemistry journal article supplement (doi:10.1039/c2jm13329f), 2012-01-01
Supplement: c2jm13329f.pdf [file c2jm13329f.pdf]

Supporting Information

**Damage-free Hybrid Encapsulation of Organic Field-Effect Transistors to Reduce Environmental Instability**

Se Hyun Kim<sup>a</sup>, Won Min Yoon<sup>a</sup>, Mi Jang<sup>b</sup>, Hoichang Yang<sup>b\*</sup>, Jong-Jin Park<sup>c</sup>, and Chan Eon Park<sup>a\*</sup>

<sup>a</sup>Polymer Research Institute, Department of Chemical Engineering,  
Pohang University of Science and Technology, Pohang, 790-784 (Korea)  
E-mail: cep@postech.ac.kr

<sup>b</sup>Optoelectronic Hybrid Center, Department of Advanced Fiber Engineering,  
Inha University, Incheon, 402-751 (Korea)  
E-mail: hcyang@inha.ac.kr

<sup>c</sup>Samsung Advanced Institute of Technology (SAIT), Yongin, 449-712 (Korea)

S.H.K. and W.M.Y. contributed equally to this work.

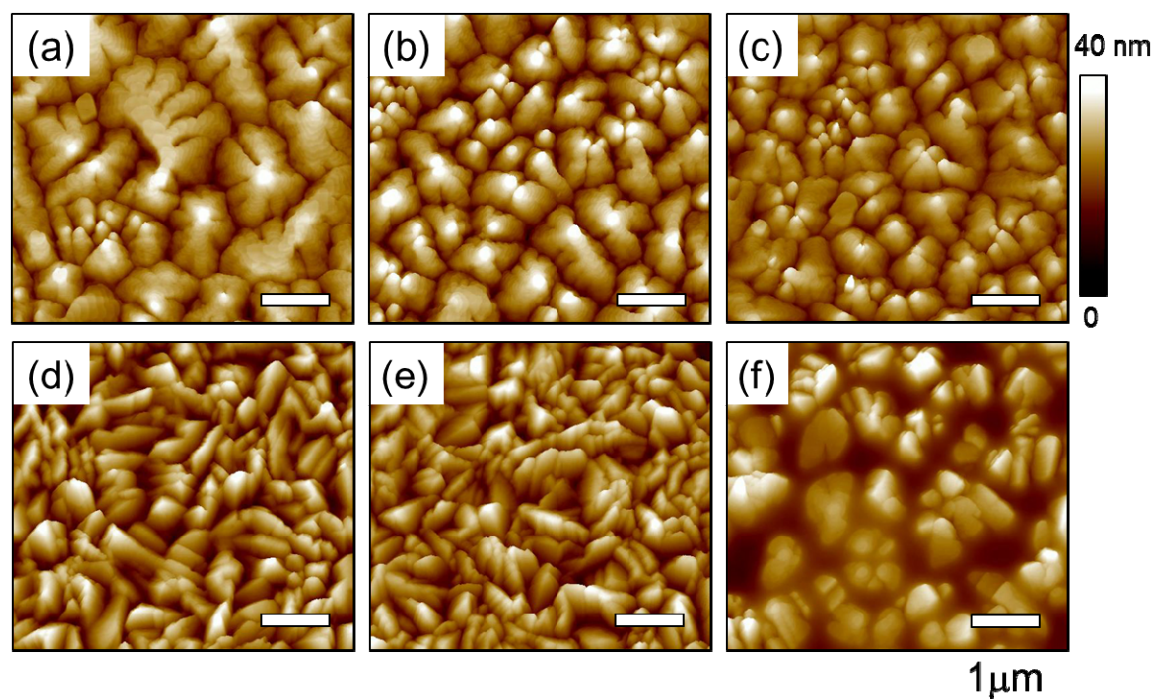

**Fig. S1.** AFM topographies of 50 nm thick pentacene films on the PS/SiO<sub>2</sub> dielectrics after annealing at various temperatures for 1 h: (a) 30 °C; (b) 60 °C; (c) 90 °C; (d) 120 °C; (e) 150 °C; (f) 180 °C.

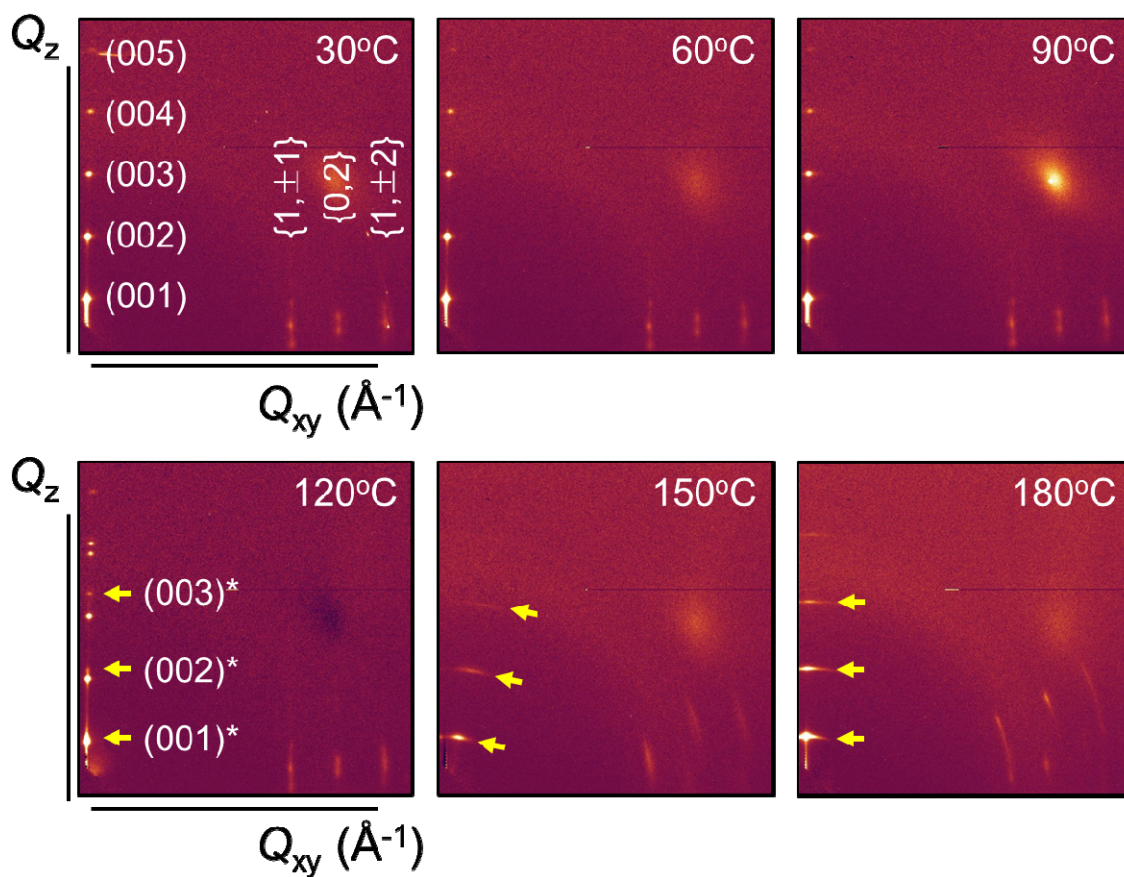

**Fig. S2.** 2D X-ray  $\theta/2\theta$  scanning patterns showing the overall crystal structures of 50 nm thick pentacene films on the PS/SiO<sub>2</sub> dielectrics after annealing at various temperatures for 1 h. (Based on two different X-ray modes: GIXD and  $\theta/2\theta$  scanning, it was found that the 120 °C sample contained two different types of “*bulk phase*”, located at different film levels.)

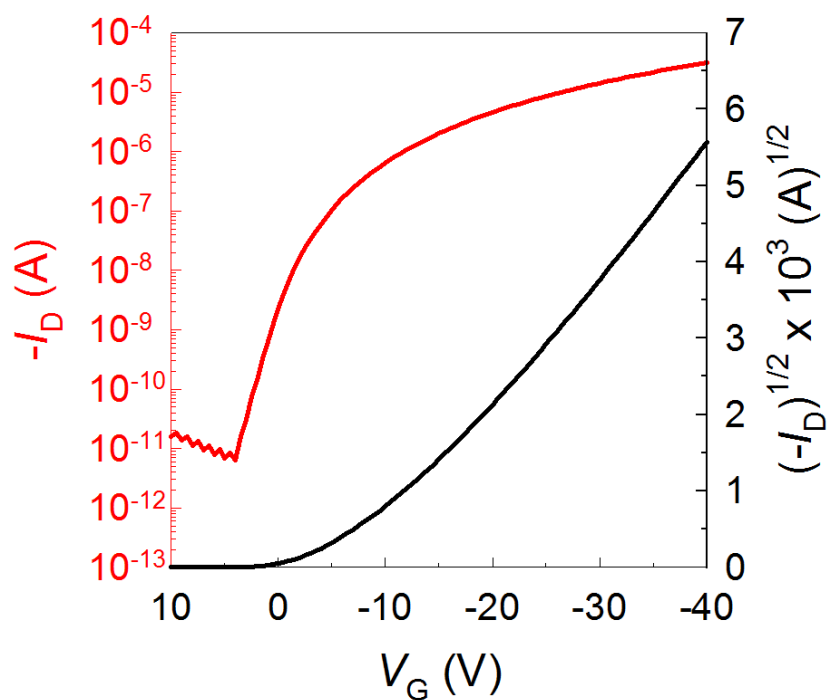

**Fig. S3.**  $I_D$ - $V_G$  transfer characteristics of a top-contact electrode pentacene OFET (with channel length  $L = 100 \mu\text{m}$  and width  $W = 1500 \mu\text{m}$ ) employing a PI/SiO<sub>2</sub> dielectric ( $V_{DS} = -40$  V).

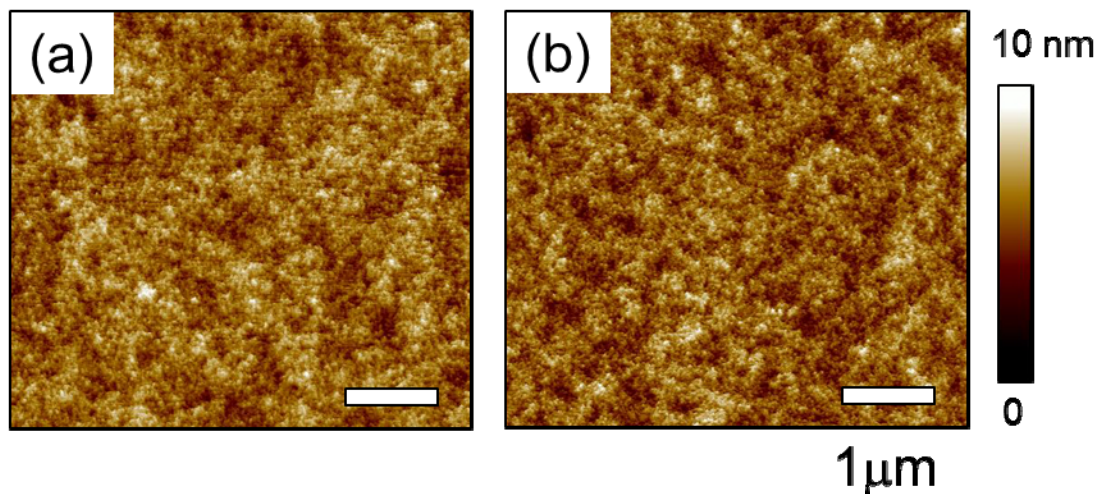

**Fig. S4.** AFM surface topographies of a PS/SiO<sub>2</sub> dielectric before (a) and after (b) SiO<sub>x</sub> layer coating.

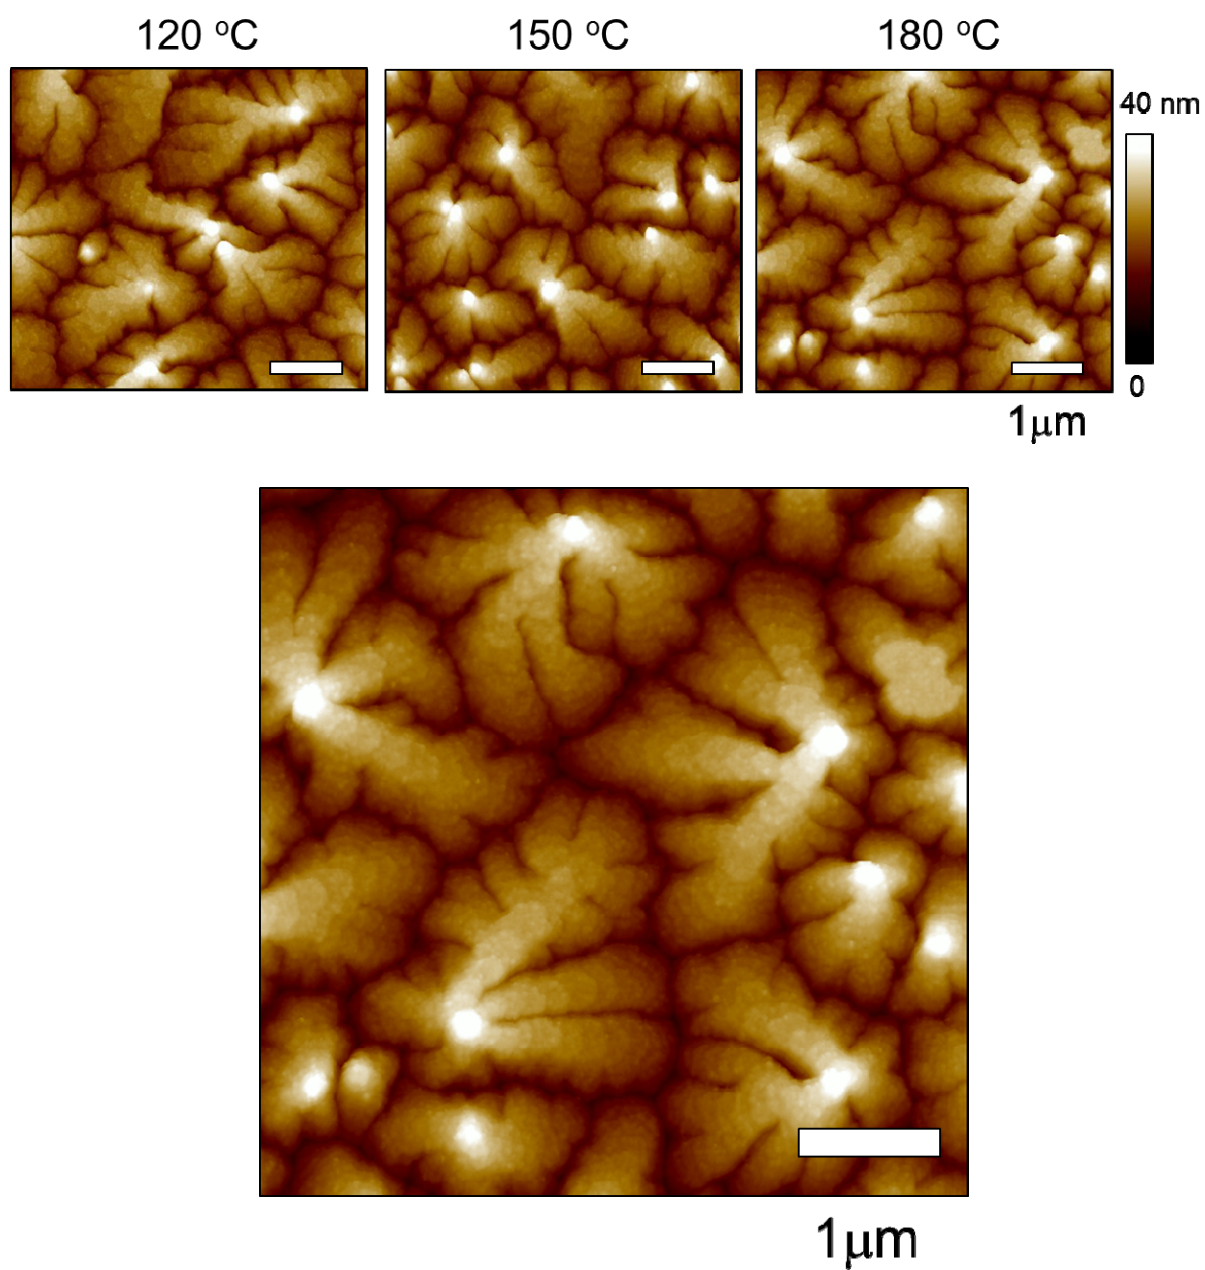

**Fig. S5.** AFM topographies of SiO<sub>x</sub>-capped pentacene films on PI/SiO<sub>2</sub> dielectrics after thermal annealing at various temperatures for 1 h.

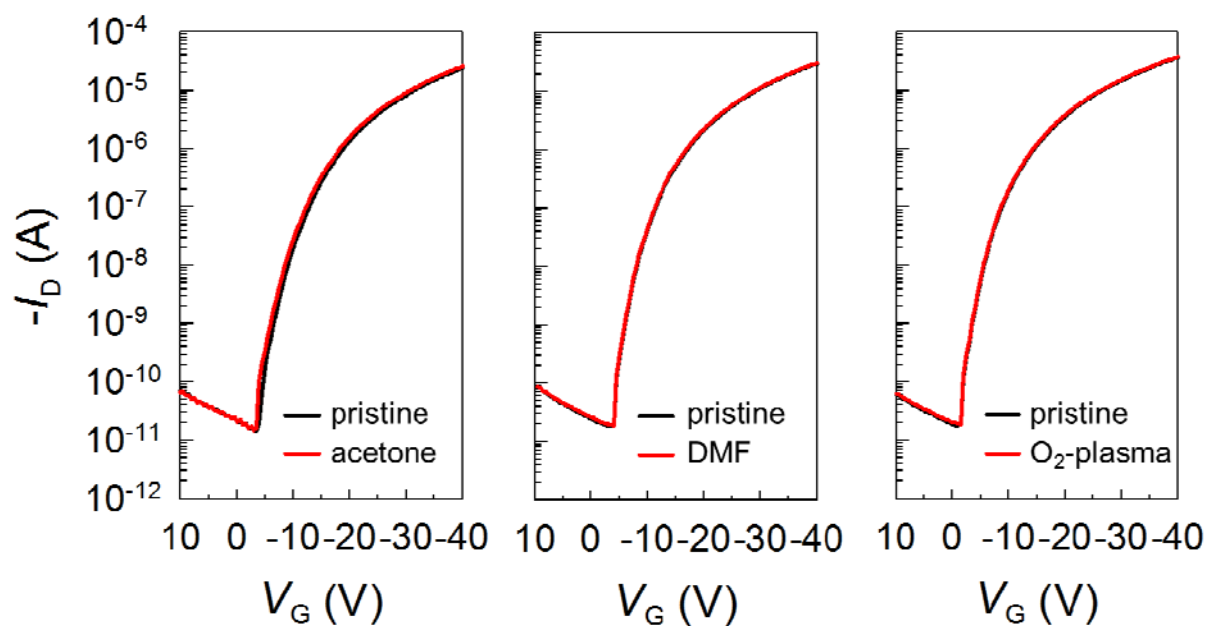

**Fig. S6.**  $I_D$ - $V_G$  transfer curves of  $\text{SiO}_x$ -capped pentacene OFETs employing PS/ $\text{SiO}_2$  dielectrics before and after aging in various environments: acetone, DMF, and  $\text{O}_2$  plasma ( $V_D = -40$  V).

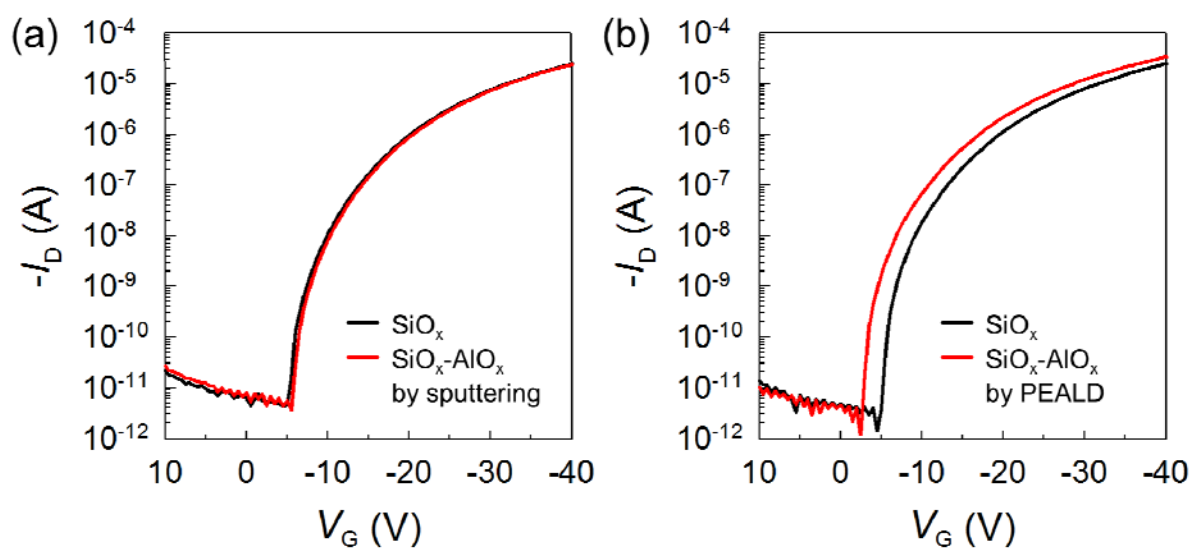

**Fig. S7.**  $I_D$ - $V_G$  transfer curves of  $\text{SiO}_x$ -capped pentacene OFETs employing PS/ $\text{SiO}_2$  dielectrics before and after the deposition of a 50 nm thick  $\text{AlO}_x$ -layer by using (a) RF magnetron sputtering and (b) PEALD ( $V_D = -40$  V).

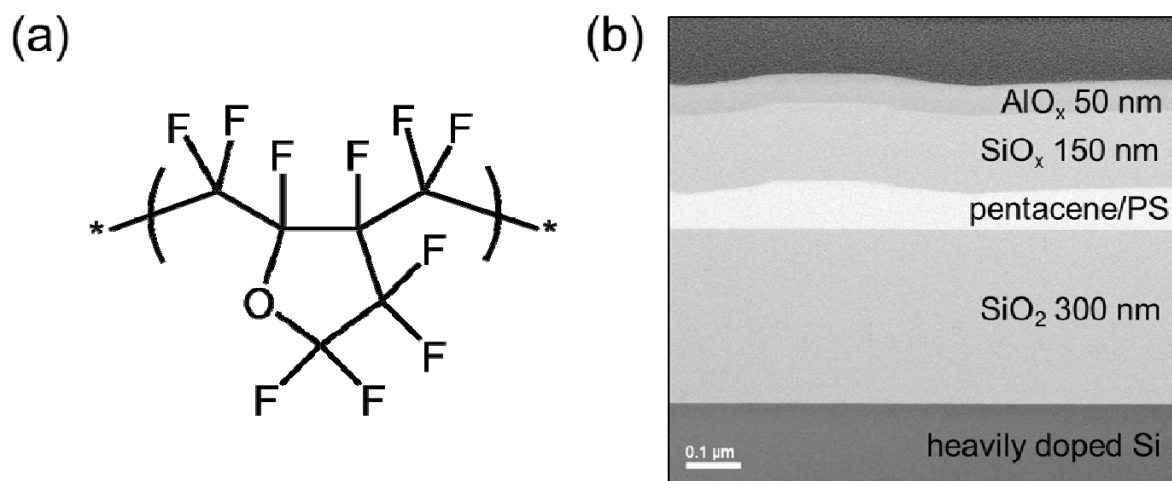

**Fig. S8.** (a) Chemical structure of the CYTOP™ polymer. (b) Cross-sectional transmission electron microscopy (TEM) image of pentacene OFET device encapsulated by SiO<sub>x</sub>-AlO<sub>x</sub> bilayer.
